# Supplementary material for: The Influence of Eggshell on Bone Regeneration in Preclinical In Vivo Studies
Source: MDPI journal article supplement (doi:10.3390/biology9120476), 2020-12-18
Supplement: s1 [file s1]

**Table S1.** Categories to assess the quality of the included studies.

| Item | Description                                                                                                      | Grade                                                                           |
|------|------------------------------------------------------------------------------------------------------------------|---------------------------------------------------------------------------------|
| 1    | Ethical statement (nature of ethical review permissions or institutional guidelines for care and use of animals) | 0 = clearly insufficient<br>1 = possibly sufficient<br>2 = clearly sufficient   |
| 2    | Experimental procedures (precise details of all procedure performed)                                             | 0 = clearly insufficient<br>1 = possibly sufficient<br>2 = clearly sufficient   |
| 3    | Experimental animals (details of animal used including species, developmental stage or mean age, diagnosis)      | 0 = clearly insufficient<br>1 = possibly sufficient<br>2 = clearly sufficient   |
| 4    | Randomization                                                                                                    | 0 = no<br>1 = unclear<br>2 = yes                                                |
| 5    | Allocation concealment                                                                                           | 0 = no<br>1 = unclear<br>2 = yes                                                |
| 6    | Sample size calculation                                                                                          | 0 = no<br>1 = unclear<br>2 = yes                                                |
| 7    | Completeness of information                                                                                      | 0 = no<br>1 = unclear<br>2 = yes                                                |
| 8    | Blinding of the evaluator                                                                                        | 0 = no<br>1 = unclear<br>2 = yes                                                |
| 9    | Financial conflict of interest                                                                                   | 0 = clearly inadequate<br>1 = unclear/possibly adequate<br>2 = clearly adequate |

**Table S2.** Study quality assessment – ARRIVE guidelines

| References                                      | Ethical statement | Experimental procedures | Experimental animals | Randomization | Allocation concealment | Sample size calculation | Completeness of information | Blinding of the evaluator | Financial conflict of interest |
|-------------------------------------------------|-------------------|-------------------------|----------------------|---------------|------------------------|-------------------------|-----------------------------|---------------------------|--------------------------------|
| (Laurent Dupoirieux et al. 1995)                | 0                 | 2                       | 2                    | 0             | 1                      | 0                       | 2                           | 1                         | 1                              |
| (Laurent Dupoirieux et al. 1999)                | 0                 | 2                       | 2                    | 0             | 1                      | 0                       | 2                           | 1                         | 1                              |
| (Laurent Dupoirieux, Neves, and Pourquier 2000) | 0                 | 2                       | 2                    | 0             | 1                      | 0                       | 2                           | 1                         | 1                              |
| (Bae et al. 2007)                               | 0                 | 2                       | 2                    | 0             | 1                      | 0                       | 2                           | 1                         | 1                              |
| (J.-W. Park et al. 2008)                        | 2                 | 2                       | 2                    | 2             | 1                      | 0                       | 2                           | 1                         | 1                              |
| (J.-W. Park et al. 2009)                        | 2                 | 2                       | 2                    | 0             | 1                      | 0                       | 2                           | 1                         | 2                              |
| (Kweon et al. 2011)                             | 2                 | 2                       | 2                    | 2             | 1                      | 0                       | 2                           | 1                         | 1                              |
| (Lee et al. 2012)                               | 2                 | 2                       | 2                    | 2             | 1                      | 0                       | 2                           | 1                         | 1                              |
| (Uraz et al. 2013)                              | 2                 | 2                       | 2                    | 2             | 1                      | 0                       | 2                           | 1                         | 1                              |
| (Balázs et al. 2012)                            | 2                 | 2                       | 2                    | 2             | 1                      | 0                       | 2                           | 1                         | 2                              |
| (Lee et al. 2014)                               | 2                 | 2                       | 2                    | 0             | 1                      | 0                       | 2                           | 1                         | 2                              |
| (Jayasree et al. 2019)                          | 2                 | 2                       | 2                    | 2             | 1                      | 0                       | 2                           | 1                         | 1                              |
| (Kavarthapu and Malaiappan 2019)                | 2                 | 2                       | 2                    | 0             | 1                      | 2                       | 2                           | 1                         | 2                              |
| (Salama et al. 2019)                            | 2                 | 2                       | 2                    | 2             | 1                      | 0                       | 2                           | 1                         | 2                              |
| (Huang et al. 2020)                             | 2                 | 2                       | 2                    | 2             | 1                      | 0                       | 2                           | 1                         | 2                              |
| (L. Dupoirieux 1999)                            | 0                 | 2                       | 2                    | 0             | 1                      | 0                       | 2                           | 1                         | 1                              |
| (E. Durmuş et al. 2003)                         | 2                 | 2                       | 2                    | 0             | 1                      | 0                       | 2                           | 1                         | 1                              |
| (J. Park et al. 2006)                           | 0                 | 2                       | 2                    | 0             | 1                      | 0                       | 2                           | 1                         | 1                              |
| (Ercan Durmuş et al. 2008)                      | 2                 | 2                       | 2                    | 0             | 1                      | 0                       | 2                           | 1                         | 1                              |
| (Uygur et al. 2011)                             | 2                 | 2                       | 2                    | 0             | 1                      | 0                       | 2                           | 1                         | 1                              |

**Table S3.** Risk of bias assessment of the selected studies according to the SYRCL tool

| References                                      | Allocation Sequence Generation | Baseline Characteristics | Allocation Concealment | Random Housing | Blinding of Care Giver/ Investigator | Random Outcome Assessment | Blinding of Outcome Assessor | Incomplete Outcome Data Addressed | Free from Selective Outcome | Free from Other Sources of Bias |
|-------------------------------------------------|--------------------------------|--------------------------|------------------------|----------------|--------------------------------------|---------------------------|------------------------------|-----------------------------------|-----------------------------|---------------------------------|
| (Laurent Dupoirieux et al. 1995)                | Unclear                        | Unclear                  | Unclear                | Unclear        | No                                   | Unclear                   | No                           | Yes                               | Yes                         | Yes                             |
| (Laurent Dupoirieux et al. 1999)                | Unclear                        | Yes                      | Unclear                | Unclear        | No                                   | Unclear                   | No                           | Yes                               | Yes                         | Yes                             |
| (Laurent Dupoirieux, Neves, and Pourquier 2000) | Unclear                        | Yes                      | Unclear                | Unclear        | No                                   | Unclear                   | No                           | Yes                               | Yes                         | Yes                             |
| (Bae et al. 2007)                               | Unclear                        | Yes                      | Unclear                | Unclear        | No                                   | Unclear                   | No                           | Yes                               | Yes                         | Yes                             |
| (J.-W. Park et al. 2008)                        | Yes                            | Yes                      | Unclear                | Unclear        | No                                   | Unclear                   | No                           | Yes                               | Yes                         | Yes                             |
| (J.-W. Park et al. 2009)                        | Unclear                        | Yes                      | Unclear                | Unclear        | No                                   | Unclear                   | No                           | Yes                               | Yes                         | Yes                             |
| (Kweon et al. 2011)                             | Yes                            | Yes                      | Unclear                | Unclear        | No                                   | Unclear                   | No                           | Yes                               | Yes                         | Yes                             |
| (Lee et al. 2012)                               | Yes                            | Yes                      | Unclear                | Unclear        | No                                   | Unclear                   | No                           | Yes                               | Yes                         | Yes                             |
| (Uraz et al. 2013)                              | Yes                            | Yes                      | Unclear                | Yes            | No                                   | Unclear                   | No                           | Yes                               | Yes                         | Yes                             |
| (Balázs et al. 2012)                            | Yes                            | Yes                      | Unclear                | Unclear        | No                                   | Unclear                   | No                           | Yes                               | Yes                         | Yes                             |
| (Lee et al. 2014)                               | Unclear                        | Unclear                  | Unclear                | Yes            | No                                   | Unclear                   | No                           | Yes                               | Yes                         | Yes                             |
| (Jayasree et al. 2019)                          | Yes                            | Yes                      | Unclear                | Yes            | No                                   | Unclear                   | No                           | Yes                               | Yes                         | Yes                             |
| (Kavarthapu and Malaiappan 2019)                | Unclear                        | Unclear                  | Unclear                | Unclear        | No                                   | Unclear                   | No                           | Yes                               | Yes                         | Yes                             |
| (Salama et al. 2019)                            | Yes                            | Yes                      | Unclear                | Yes            | No                                   | Yes                       | No                           | Yes                               | Yes                         | Yes                             |
| (Huang et al. 2020)                             | Yes                            | Yes                      | Unclear                | Yes            | No                                   | Unclear                   | No                           | Yes                               | Yes                         | Yes                             |
| (L. Dupoirieux 1999)                            | Unclear                        | Unclear                  | Unclear                | Unclear        | No                                   | Unclear                   | No                           | Yes                               | Yes                         | Yes                             |
| (E. Durmuş et al. 2003)                         | Unclear                        | Unclear                  | Unclear                | Unclear        | No                                   | Unclear                   | No                           | Yes                               | Yes                         | Yes                             |
| (J. Park et al. 2006)                           | Unclear                        | Yes                      | Unclear                | Yes            | No                                   | Unclear                   | No                           | Yes                               | Yes                         | Yes                             |
| (Ercan Durmuş et al. 2008)                      | Unclear                        | Unclear                  | Unclear                | Unclear        | No                                   | Unclear                   | No                           | Yes                               | Yes                         | Yes                             |
| (Uygur et al. 2011)                             | Unclear                        | Yes                      | Unclear                | Yes            | No                                   | Unclear                   | No                           | Yes                               | Yes                         | Yes                             |
